# Supplementary material for: Comprehensive molecular exploration identified promoter DNA methylation of the CRBP1 gene as a determinant of radiation sensitivity in rectal cancer
Source: PubMed Central journal article supplement — Br J Cancer. 2017 Mar 14;116(8):1046–56. doi: 10.1038/bjc.2017.65 (PMC5396119; doi:10.1038/bjc.2017.65), 2017-03-14
Supplement: bjc201765x1.pdf [file bjc201765x1.pdf]

**Table. S1 Sequences of primers and fluorescent probes for CRBP1 gene and  $\beta$ -actin**

|                        | Forward primer (5'-3')                                          | Reverse primer (3'-5')     | Fluorecent probe (5'-3')                 | Annealing temperature (°C) | Number of cycles |
|------------------------|-----------------------------------------------------------------|----------------------------|------------------------------------------|----------------------------|------------------|
| RT-PCR and qRT-PCR     |                                                                 |                            |                                          |                            |                  |
| CRBP1 RT-PCR           | ccttaaaggctgctgaggtg                                            | ttcagcaatcatgggttca        |                                          | 58                         | 30               |
| CRBP1 qRT-PCR          | ccttaaaggctgctgaggtg                                            | ttcagcaatcatgggttca        | FAM-agagcaggccactgaccta-TAMRA            | 60                         | 40               |
| $\beta$ -actin RT-PCR  | tcaccacactgtgccatctacga                                         | cagcggaaaccgctcattgccaatgg |                                          | 58                         | 28               |
| $\beta$ -actin qRT-PCR | gccaacacagtgtgtctg                                              | cacatctgctggaaggtgg        | FAM-aggagcaatgatcttgatcttca-TAMRA        | 58                         | 40               |
| Bisulfite sequece      |                                                                 |                            |                                          |                            |                  |
| CRBP1                  | gtttggaggagtgtagtggta                                           | cactacaacctttatctaaaacct   |                                          | 52                         | 40               |
| qMSP                   |                                                                 |                            |                                          |                            |                  |
| CRBP1                  | ggattataggcgttcgcgattacg                                        | ctaaaacctcgcgccgataaac     | FAM-agtgtgggattataggcgtgagtcgtcgtg-TAMRA | 62                         | 40               |
| $\beta$ -actin         | tggtgatggaggaggttagtaagt                                        | aaccaataaacctactcctccctaa  | FAM-accaccaccaacacacaataacaaacaca-TAMRA  | 62                         | 40               |
| Plasmid construction   |                                                                 |                            |                                          |                            |                  |
| CRBP1                  | aaagaattcatggatcctcccgcaggctttgt aaactcgagccagtgagctgagatcacgcg |                            |                                          | 56                         | 32               |
