# Supplementary material for: Comprehensive molecular exploration identified promoter DNA methylation of the CRBP1 gene as a determinant of radiation sensitivity in rectal cancer
Source: PubMed Central journal article supplement — Br J Cancer. 2017 Mar 14;116(8):1046–56. doi: 10.1038/bjc.2017.65 (PMC5396119; doi:10.1038/bjc.2017.65), 2017-03-14
Supplement: bjc201765x2.pdf [file bjc201765x2.pdf]

Table. S2 Primer sequence and PCR conditions for the confirmation of microarray analysis by RT-PCR

|           | Forward primer (5'-3')  | Reverse primer (3'-5') | Annealing temperature (°C) | Number of cycles |
|-----------|-------------------------|------------------------|----------------------------|------------------|
| ACOT1     | gcacctctctgttcctggta    | tcccctccccagataatagg   | 56                         | 25               |
| AFAP1-AS1 | gggggagctgcttactctct    | atacacggacctccaagcac   | 56                         | 25               |
| ASCL2     | tgacctggggcgtataaaag    | agttcacgctcccttgaaga   | 56                         | 32               |
| AUTS2     | gcacttaagcctcaggaacg    | actgtccctgcagctgttct   | 56                         | 32               |
| C4BPB     | actgtccagagcttctccca    | caggccctgaagaactgaac   | 56                         | 32               |
| C9orf64   | gagatggctgcttcaaggac    | tcagctcaacacaccaaagc   | 56                         | 32               |
| CADM1     | cccagcctgtgatgtaact     | tgatcgagccttctcacct    | 56                         | 32               |
| CBR1      | ttcgaaggcaggaatgaact    | ttaagggtcttgacgctcat   | 56                         | 28               |
| DDX3Y     | attggcaatcgtgaaagacc    | tactgccggttgctctact    | 56                         | 32               |
| DLC1      | ttgaagccaaggaagcttgt    | tcgtctgaatcgtcactteg   | 56                         | 32               |
| EIF1AY    | cccacctgtgcatcttagt     | tcgtccatttcccaacattt   | 56                         | 32               |
| GALC      | gccaaagcgttaccatgattt   | tcttttgctgaatgggtcc    | 56                         | 32               |
| GLS2      | tccagctgtgttctgtggag    | ggaggatggctcctgataca   | 56                         | 32               |
| GSPT2     | tccaaatctgtgatcgtacc    | ctaaggcccaggacaaatacc  | 56                         | 32               |
| HDGFRP3   | gggcaacgacacaagaaaca    | gtgacctcattctccactcc   | 56                         | 32               |
| LEF1      | aaatgggtggaaaacgaagc    | gggttggcagtgattgtctt   | 56                         | 25               |
| NNT       | gcacacatacggaaatcaacc   | cagcagcacattaagctgacc  | 56                         | 32               |
| OLR1      | caaatggaactcaccaccagata | agtgggcatcaaaggag      | 56                         | 32               |
| PRTFDC1   | tgctacaggaacaagcacac    | acaatacggcacatacggttc  | 56                         | 25               |
| QPCT      | ggccagaggagaagaattacc   | tattccaagaccagtcagc    | 56                         | 32               |
| SLC2A10   | aaggaccaatgaggacaaagg   | acaagaccatcaggcacag    | 56                         | 32               |
| TMEM45B   | agattgggtttgtgctgttcc   | atttctccccttccgtgtctc  | 56                         | 32               |
| TSPAN8    | ctagctcctacgttgctgtgg   | tcattcacaatgcgatcagac  | 56                         | 32               |
| TXLNG2P   | tgaagaagctggactttgtg    | gctcccttctgactcttgtg   | 56                         | 32               |
| VIL1      | cctatgccaacaccaagagact  | tccaatccagaagaagacc    | 56                         | 32               |
| ZNF260    | cagacacaccaagtcaatcct   | gggcaacaagaacaaaactc   | 56                         | 28               |
| ANTXR1    | tctgccaggaggagacactt    | gccagctgtgtctcattgaa   | 56                         | 32               |
| B3GNT7    | tgaagaaaaccgtctaccg     | ggttcaccagctgtccattt   | 56                         | 32               |
| BEX2      | gcccttcttgatgcagaaaa    | agggtccccctttattagca   | 56                         | 32               |
| BNIP3     | accctcagcatgaggaacac    | atcaaaaggtgctggtggag   | 56                         | 32               |
| BST2      | cgcttgaacattcccttgat    | ctcagggtgggagacaagag   | 56                         | 32               |
| C10orf116 | tgctcttgacactccacag     | tcagaggcctggttagcagt   | 56                         | 32               |
| CD109     | tgtctccttcccacatcctc    | cagcttcttcccacaaactgc  | 56                         | 32               |

|          |                         |                        |    |    |
|----------|-------------------------|------------------------|----|----|
| CHST15   | atggcaatccatccatcaat    | gagggtgcacattcttgggt   | 56 | 32 |
| CRIP1    | aaatgtgggaagacgctgac    | ctgagagcattaggggcaac   | 56 | 32 |
| CSAG2    | tgttgagagacgctggtctg    | tcctggaactccttgatgg    | 56 | 32 |
| DNAJA4   | aatgcttcccacaaagtg      | ctgtgcaatgagaggaacga   | 56 | 30 |
| ELOVL5   | gtgcacattccctcttggtt    | tggttcacattgtttcca     | 56 | 32 |
| FAM101B  | tacgactccgagaggcactt    | gaaacctcctcagcgtcttg   | 56 | 32 |
| FAM127B  | attctgcccacagacctacg    | cttaagccctggcagctatg   | 56 | 32 |
| FERMT2   | accagtgggtgggtgtgaat    | caattcatggccctaaggaa   | 56 | 32 |
| FHL1     | gcaggtgatttgggaagtgt    | ttcagcactgcaggaacatc   | 56 | 32 |
| FNBP1    | gtcgatgtcatccgtgtgtc    | gcgtcaaacaaaatgtgtg    | 56 | 32 |
| GJC1     | ggaagatgggctcatgaaaa    | gcaaaggcctgtaacacat    | 56 | 32 |
| GPAT2    | cctgccagtcttctactgc     | ctggctgagcctgaagtacc   | 56 | 32 |
| GPR87    | ggggagatgttctgtttca     | aacacttggggacgattgag   | 56 | 32 |
| HBE1     | ctgagtgagctgactgtgac    | acacctgcaactggaagaga   | 56 | 32 |
| HS6ST2   | cttcggcctcactgagtctt    | cctcctgatgctctttctgc   | 56 | 32 |
| IFI27    | ccaagcttaagacgggtgagg   | aaaactacggcagagccaga   | 56 | 32 |
| IFI44L   | tatgtgtgttggctgggaga    | gggcctgcatacctcataga   | 56 | 32 |
| KRT23    | ccacctggagaaggaaatca    | acaggcggaaacttctattg   | 56 | 32 |
| L1CAM    | ggtacagtctgggcaagggtc   | ttcacatccacagggtcttc   | 56 | 32 |
| LHX2     | acgtccgtcttaacttctgtg   | caggcgagatcctaaaatgtg  | 56 | 28 |
| MAGEA2   | ggaggagcattgaaggagaaaga | agaagaggaagaagcggctctg | 56 | 32 |
| MAGEA3   | aagetgctcaccacaacattc   | cccctctctcaaaaccactc   | 56 | 32 |
| MAGEA6   | ccctcattgaaaccagctatg   | ggcagtggaactaagggatg   | 56 | 32 |
| MAGEB2   | tcctctaaccaggaagtcaagg  | tcgatgaaggtgtaagtgtgg  | 56 | 32 |
| MIR100HG | ttggagtgtggcagagtaagg   | agggtggaaaccaaagaagtg  | 56 | 28 |
| NPW      | ccagagactcggagagacg     | tcaggcggattttattgacc   | 56 | 32 |
| SLC10A4  | agaagcggggattttgttt     | agaagtctgagcggttcca    | 56 | 32 |
| SLCO3A1  | aaatccttcgcttcatcct     | gccctcagcttctcaciaag   | 56 | 32 |
| SMARCA1  | agactggaaccacagggtg     | tcctctttgccagcttgtt    | 56 | 32 |
| STC2     | ggattccaggacaggagtga    | cccagcccagacagtacaat   | 56 | 28 |
| SYT1     | atttccaggccacaagacag    | ttactgggaacagccaacc    | 56 | 32 |
| ZNF385B  | ccattcctccagctcttctg    | ctgcattttgtgggtgaatg   | 56 | 32 |

---
